# Supplementary material for: A Randomized Controlled Trial of Parent-Child Psychotherapy Targeting Emotion Development for Early Childhood Depression
Source: Atypon-hosted journal article supplement (doi:10.1176/appi.ajp.2018.18030321), 2018-06-20
Supplement: appi.ajp.2018.18030321.ds001.pdf [file appi.ajp.2018.18030321.ds001.pdf]

Data Supplement for Luby et al., A Randomized Controlled Trial of Parent-Child Psychotherapy Targeting Emotion Development for Early Childhood Depression. Am J Psychiatry (doi: 10.1176/appi.ajp.2018.18030321)

## **CONTENTS**

**Investigators Training/Supervision/Fidelity Monitoring Therapy Completion**

**Maintaining the Blind Imputation Methods**

**Figure S1. PCIT-ED Study Design**

**Figure S2. CONSORT Diagram of PCIT-ED Study**

**Table S1. Post Assessment Demographic Characteristics of PCIT-ED and Wait List Subjects**

**Table S2. Baseline Emotion, Cognitive, and Executive Characteristics in PCIT-ED and Wait List Subjects**

**Table S3. Baseline Parenting Stress Index in PCIT-ED and Wait List Subjects**

**Training/Supervision/Fidelity Monitoring:** All study therapists were master's level clinicians who were trained to proficiency in standard PCIT. Training on the ED module was conducted by the PI. The study PI, an experienced preschool child psychiatrist, provided weekly clinical supervision to study therapists. A master PCIT trainer/clinician provided ongoing consultation to the study clinicians during on-site visits and regular telephone consults, and one of the study therapists was formally certified to train therapists to administer PCIT. Following established procedures, fidelity monitoring of PCIT-ED was completed by an observing co-therapist at random sessions. Integrity and fidelity checklists were done at each session by the therapist, consistent with PCIT protocol.

**Therapy Completion:** Of the 114 subjects randomized to PCIT-ED, 6 did not complete any therapy sessions, and 93 completed all 20 therapy sessions. The mean (SD) number of sessions completed was 17.4 (6.0).

**Maintaining the Blind:** A select group of clinicians remained blind to whether or not participants were randomized to treatment. These blind clinicians had offices in locations where they would not interface with families coming for treatment and had no knowledge of if or when participants received treatment. Blind clinicians were the sole interviewers to complete all post assessments. Non-blind child interviewers reminded parents at the beginning of each post assessment that the parent interviewer was blind to whether or not they had received treatment and when. This allowed parents to ask any necessary questions before interacting with the blind interviewer. All randomization emails, confirmation calls, scheduling requests, and childcare were completed by non-blind interviewers to protect against the potential of the blind being broken. Following each post assessment, blind interviewers rated whether they believe the family had or had not completed treatment and their confidence in that rating. On occasions where a family broke the blind the interviewers then noted

this in the coding section. The blind was broken in N=8 subjects.

**Imputation Methods:** The MI and MIANALYZE procedures in SAS v9.4 were used to create 25 multiply imputed datasets that were then pooled for analyses comparing post outcomes in PCIT-ED and WL subjects. Variables included in the multiple imputation process were the baseline characteristics corresponding to the outcomes of interest, gender, and the baseline variables age, income-to-needs ratio, externalizing disorder, and internalizing disorder. Several subjects were missing baseline income- to-needs ratio, so these scores were imputed in addition to the outcome measures. Imputations were conducted by randomization group. General linear models for the continuous variables and a logistic regression for MDD diagnosis were then conducted on the multiply imputed datasets, covarying for baseline characteristics, gender, and baseline externalizing disorder.

**FIGURE S1. PCIT-ED Study Design**

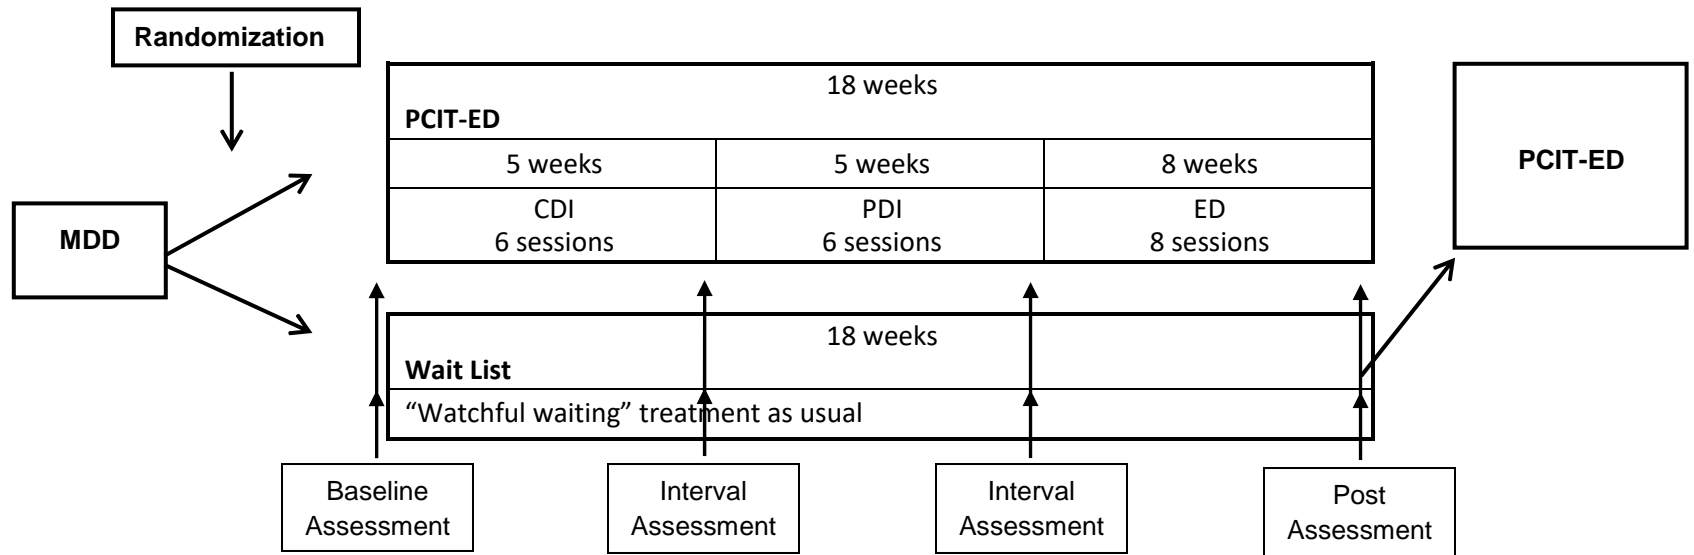

**FIGURE S2. CONSORT Diagram of PCIT-ED Study**

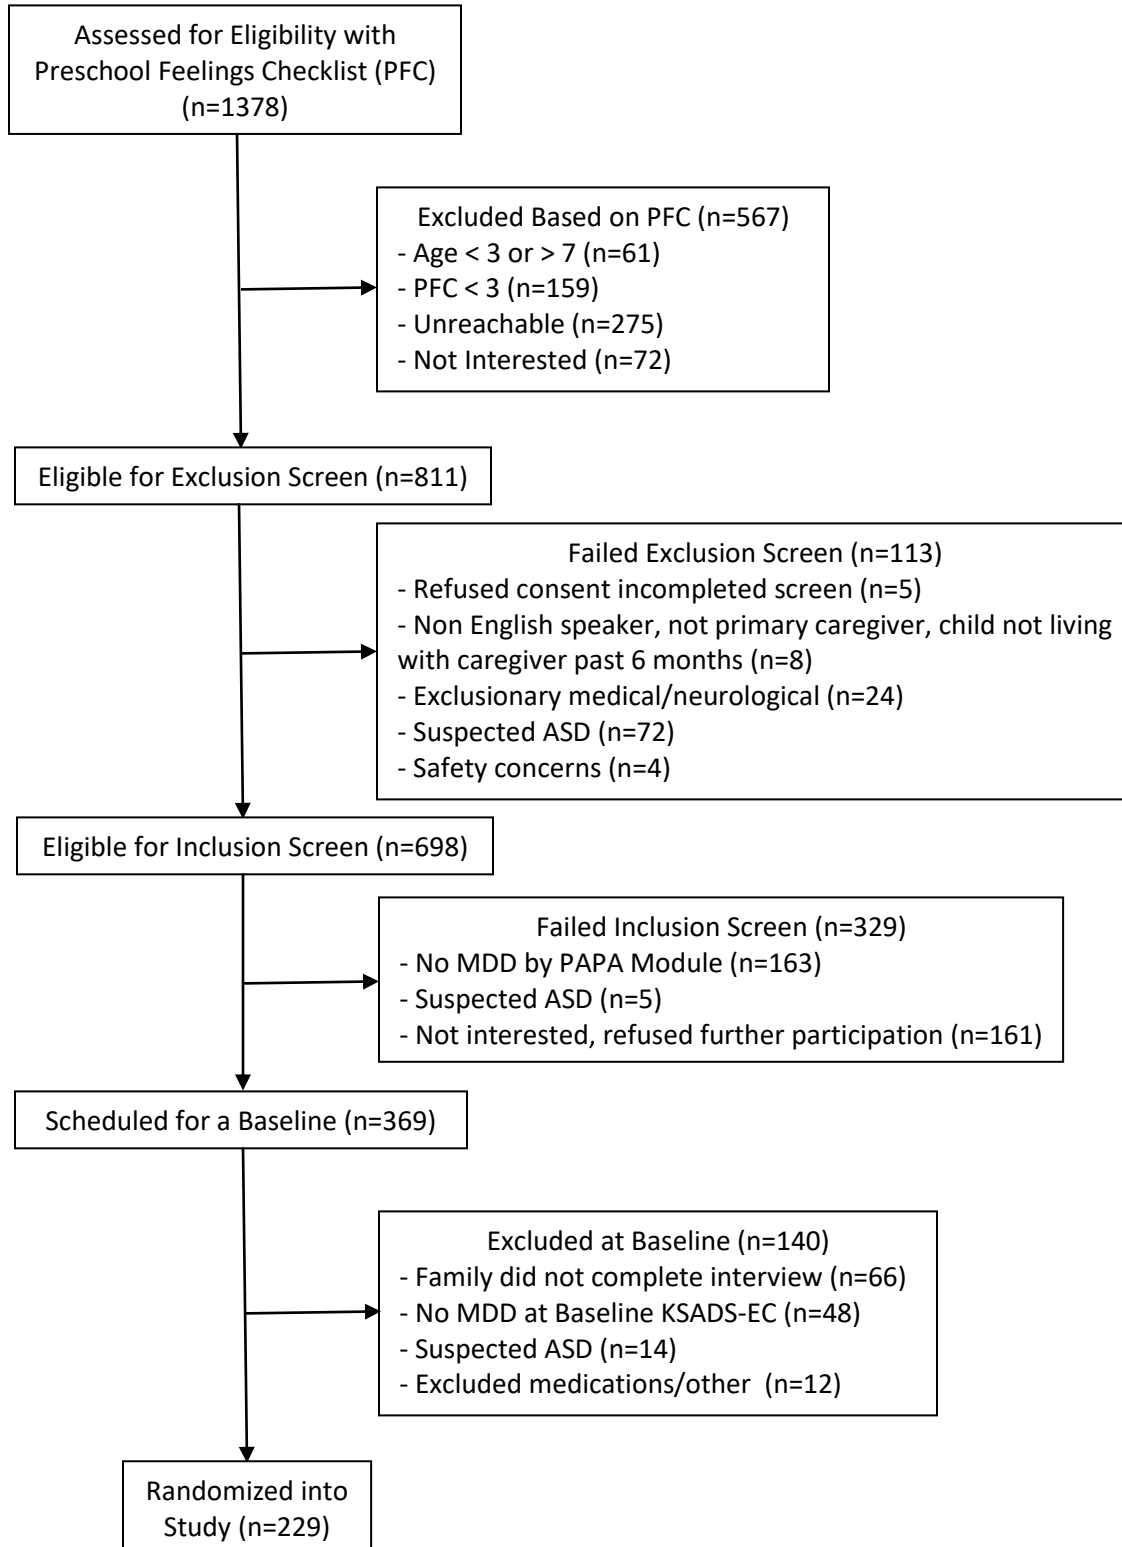

*(Continued)*

(Figure S2 continued)

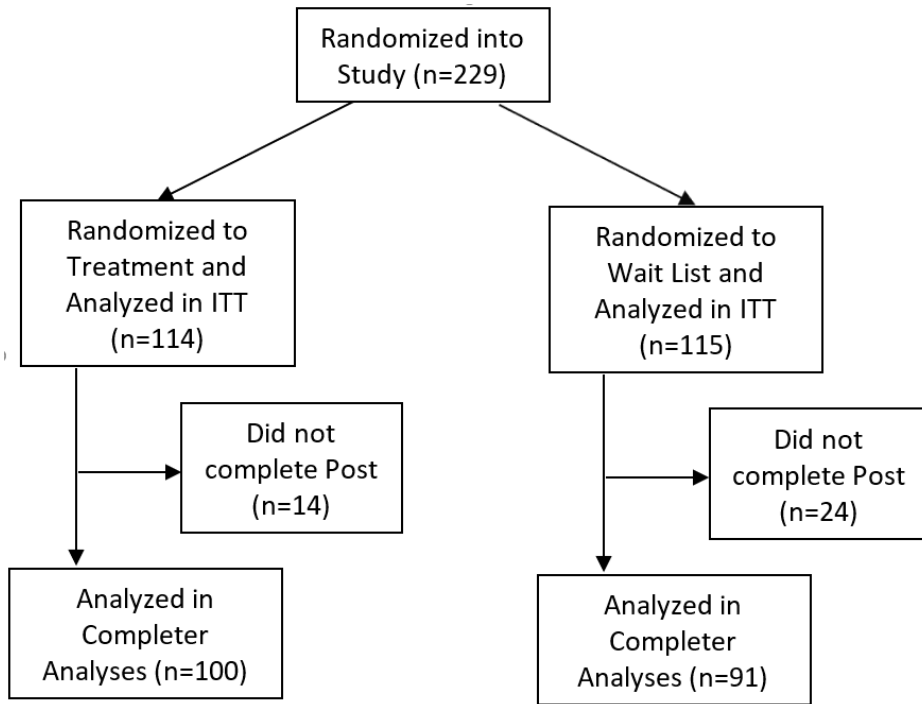

**Therapy Compliance:** There were 20 therapy sessions over 18 weeks. 93/114 (81.6%) subjects completed all 20 sessions. The mean (SD) of sessions completed was 17.4 (6.0). The following table shows number of subjects by number of sessions completed.

| N sessions | N subjects |
|------------|------------|
| 0          | 6          |
| 3          | 3          |
| 4          | 3          |
| 5          | 2          |
| 8          | 1          |
| 9          | 1          |
| 14         | 2          |
| 15         | 1          |
| 16         | 1          |
| 17         | 1          |
| 20         | 93         |

**TABLE S1. Post Assessment Demographic Characteristics of PCIT-ED and Wait List Subjects**

| Post Demographics     | Wait List (N=91) |      | PCIT-ED (N=100) |      | t        | p      |
|-----------------------|------------------|------|-----------------|------|----------|--------|
|                       | Mean             | SD   | Mean            | SD   |          |        |
| Age                   | 5.66             | 1.15 | 5.61            | 0.97 | 0.33     | 0.7431 |
| Income-to-needs ratio | 2.94             | 1.34 | 3.24            | 1.21 | -1.59    | 0.1125 |
|                       | %                | N    | %               | N    | $\chi^2$ | p      |
| Female gender         | 33.0             | 30   | 34.0            | 34   | 0.02     | 0.8799 |
| Hispanic ethnicity    | 8.8              | 8    | 14.0            | 14   | 1.27     | 0.2601 |
| Race                  |                  |      |                 |      |          |        |
| Caucasian             | 73.6             | 67   | 86.0            | 86   | F.E.     | 0.0594 |
| African-American      | 13.2             | 12   | 5.0             | 5    |          |        |
| Asian                 | 0.0              | 0    | 1.0             | 1    |          |        |
| More than 1 race      | 13.2             | 12   | 8.0             | 8    |          |        |

F.E. = Fisher's Exact test

**TABLE S2. Baseline Emotion, Cognitive, and Executive Characteristics in PCIT-ED and Wait List Subjects**

| ERC                       | Wait List (N=115) |      | PCIT-ED (N=114) |      | Wait List vs. PCIT-ED |        |
|---------------------------|-------------------|------|-----------------|------|-----------------------|--------|
|                           | Mean              | SD   | Mean            | SD   | t                     | p      |
| Lability/negativity       | 38.50             | 7.23 | 37.75           | 6.50 | 0.82                  | 0.4157 |
| Emotion regulation        | 23.21             | 3.36 | 23.22           | 3.34 | -0.02                 | 0.9809 |
| <b>My Child</b>           | Mean              | SD   | Mean            | SD   | t                     | p      |
| Guilt reparation          | 24.42             | 5.25 | 24.28           | 4.98 | 0.21                  | 0.8361 |
| Guilt feelings            | 18.44             | 2.50 | 17.82           | 2.61 | 1.83                  | 0.0687 |
| BIS-BAS                   | Wait List (N=100) |      | PCIT-ED (N=98)  |      | Wait List vs. PCIT-ED |        |
|                           | Mean              | SD   | Mean            | SD   | t                     | p      |
| BAS Drive                 | 21.65             | 4.53 | 20.99           | 5.28 | 0.94                  | 0.3459 |
| BAS Reward responsiveness | 28.28             | 4.14 | 27.67           | 4.48 | 0.99                  | 0.3237 |
| BAS Fun seeking           | 19.50             | 4.36 | 19.24           | 4.35 | 0.41                  | 0.6807 |



**TABLE S3. Baseline Parenting Stress Index in PCIT-ED and Wait List Subjects**

| PSI                           | Wait List (N=113) |       | PCIT-ED (N=114) |       | Wait List vs. PCIT-ED |        |
|-------------------------------|-------------------|-------|-----------------|-------|-----------------------|--------|
|                               | Mean              | SD    | Mean            | SD    | t                     | p      |
| Distractibility/hyperactivity | 28.98             | 7.01  | 27.30           | 6.66  | 1.86                  | 0.0648 |
| Adaptability                  | 32.22             | 5.67  | 32.07           | 5.35  | 0.21                  | 0.8366 |
| Reinforces parent             | 12.62             | 4.50  | 12.61           | 3.99  | 0.01                  | 0.9923 |
| Demandingness                 | 29.50             | 6.59  | 28.65           | 6.00  | 1.01                  | 0.3129 |
| Mood                          | 19.50             | 3.04  | 18.84           | 3.24  | 1.59                  | 0.1136 |
| Acceptability                 | 15.58             | 3.59  | 14.92           | 3.44  | 1.40                  | 0.1621 |
| Child domain                  | 138.41            | 21.03 | 134.40          | 18.54 | 1.52                  | 0.1295 |
| Competence                    | 32.14             | 7.18  | 31.05           | 7.27  | 1.14                  | 0.2574 |
| Isolation                     | 14.66             | 5.36  | 14.24           | 5.08  | 0.61                  | 0.5426 |
| Attachment                    | 13.39             | 4.61  | 12.92           | 3.87  | 0.83                  | 0.4081 |
| Health                        | 12.29             | 4.23  | 11.67           | 4.00  | 1.15                  | 0.2524 |
| Role restriction              | 19.45             | 5.91  | 19.18           | 5.50  | 0.35                  | 0.7247 |
| Depression                    | 22.38             | 6.69  | 21.63           | 6.44  | 0.85                  | 0.3955 |
| Spouse                        | 19.23             | 6.85  | 18.63           | 6.43  | 0.67                  | 0.5033 |
| Life stress                   | 9.15              | 8.29  | 9.65            | 9.85  | -0.41                 | 0.6818 |
| Parent domain                 | 133.95            | 30.50 | 129.32          | 29.19 | 1.17                  | 0.2449 |
| Total stress                  | 272.32            | 43.98 | 263.71          | 41.77 | 1.51                  | 0.1333 |
| Defensive responding          | 39.09             | 10.87 | 38.49           | 10.36 | 0.42                  | 0.6726 |
